# Supplementary material for: Genome sequence-based species delimitation with confidence intervals and improved distance functions
Source: Springer Nature journal article supplement (doi:10.1186/1471-2105-14-60), 2013-02-21
Supplement: 12859_2012_5891_MOESM2_ESM.pdf [file 12859_2012_5891_MOESM2_ESM.pdf]

Supplementary Table 2. Overview on the examined GBDP input parameters

| Local alignment program | Command-line options                                                                    | E-value threshold                                             | Mnemonic                                                                         |
|-------------------------|-----------------------------------------------------------------------------------------|---------------------------------------------------------------|----------------------------------------------------------------------------------|
| BLAT (BT)               | minScore=0 minIdentity=0<br>tileSize=8                                                  | 10 (“NF”),<br>10 <sup>-2</sup> (“F-2”)                        | BT_ms0.id0.TS8_NF and<br>BT_ms0.id0.TS8_F-2                                      |
|                         | minScore=30 minIdentity=50<br>tileSize=11 (default)                                     | 10, 10 <sup>-2</sup>                                          | BT_ms30.id50_NF and<br>BT_ms30.id50_F-2                                          |
|                         | minScore=30 minIdentity=90<br>tileSize=12                                               | 10, 10 <sup>-2</sup>                                          | BT_ms30.id90.TS12_NF,<br>BT_ms30.id90.TS12_F-2                                   |
| BLAST+ (BP)             | WordLength=7, 9, 11-20, 22,<br>24, 26, 28, 30, 32, 34, 36, 38, 40,<br>42, 44-46, 48, 50 | 10, 10 <sup>-1</sup> ,<br>10 <sup>-2</sup> , 10 <sup>-8</sup> | BP_WL $x$ _F- $y$ ( $x$ =word<br>length, $y$ =exponent of<br>e-value filter)     |
| NCBI-BLAST (NB)         | default settings                                                                        | 10, 10 <sup>-2</sup>                                          | NB_NF / F-2                                                                      |
| WU-BLAST (WU)           | hspsepSmax=50<br>hspsepQmax=50                                                          | 10, 10 <sup>-2</sup>                                          | WU_S50.Q50_NF and<br>WU_S50.Q50_F-2                                              |
| BLASTZ (BZ)             | K=2000 (2500, 3000, 3500)                                                               | 10, 10 <sup>-2</sup>                                          | BZ_K2000_NF / F-2<br>BZ_K2500_NF / F-2<br>BZ_K3000_NF / F-2<br>BZ_K3500_NF / F-2 |
| MUMmer (MU)             | -mum -minMatchLength=x<br>(with x=20, 30, 40, 44 or 50)                                 | -                                                             | MU_mum20, MU_mum30,<br>MU_mum40, MU_mum44,<br>MU_mum50                           |
|                         | -mumreference<br>-minMatchLength=x (with<br>x=20, 30, 40, 44 or 50)                     | -                                                             | MU_ref20, MU_ref30,<br>MU_ref40, MU_ref44,<br>MU_ref50                           |
|                         | -maxmatch<br>-minMatchLength=x (with<br>x=20, 30, 40, 44 or 50)                         | -                                                             | MU_max20, MU_max30,<br>MU_max40, MU_max44,<br>MU_max50                           |

Overview of local-alignment programs and their settings assessed in the current study. The most parameter settings were tested for BLAST+ since it is one of the most advanced local alignment tools available [26]. MUMmer does not support e-value filtering since it is restricted to exact matches (MUMs). In total 4350 distinct GBDP variants were tested (compare Supplementary Table S4) thus resulting in about 136 million individual genome comparisons which had to be conducted (i.e., 4350 settings · 156 genome pairs · (1 original distance + 100 bootstrap replicates + 100 jackknife replicates)).
