# Supplementary material for: Genome sequence-based species delimitation with confidence intervals and improved distance functions
Source: Springer Nature journal article supplement (doi:10.1186/1471-2105-14-60), 2013-02-21
Supplement: 12859_2012_5891_MOESM3_ESM.pdf [file 12859_2012_5891_MOESM3_ESM.pdf]

**Supplementary Table 3. All distance formulae used by GBDP**

| Group | ID    | Formula                                                          | Motivation                                                                                |
|-------|-------|------------------------------------------------------------------|-------------------------------------------------------------------------------------------|
| A     | $d_0$ | $1 - \frac{H_{XY} + H_{YX}}{\lambda(X, Y)}$                      | Proportion of genomes covered by HSPs [12].                                               |
| A     | $d_1$ | $1 - \frac{H_{XY} + H_{YX}}{\lambda_{\min}(X, Y)}$               | Like $d_0$ but robust against huge differences in genome size [12].                       |
| A     | $d_2$ | $-\log\left(\frac{H_{XY} + H_{YX}}{\lambda(X, Y)}\right)$        | Variant of $d_0$ rescaled for phylogenetic inference [12].                                |
| A     | $d_3$ | $-\log\left(\frac{H_{XY} + H_{YX}}{\lambda_{\min}(X, Y)}\right)$ | Variant of $d_0$ rescaled for phylogenetic inference [12].                                |
| B     | $d_4$ | $1 - \frac{2 \cdot I_{XY}}{H_{XY} + H_{YX}}$                     | Total number of identical base pairs within HSPs relative to total coverage by HSPs [12]. |
| B     | $d_5$ | $-\log\left(\frac{2 \cdot I_{XY}}{H_{XY} + H_{YX}}\right)$       | Variant of $d_4$ rescaled for phylogenetic inference [12].                                |
| C     | $d_6$ | $1 - \frac{2 \cdot I_{XY}}{\lambda(X, Y)}$                       | Total number of identical base pairs within HSPs relative to genome size [14].            |
| C     | $d_7$ | $1 - \frac{2 \cdot I_{XY}}{\lambda_{\min}(X, Y)}$                | Like $d_6$ but robust against huge differences in genome size [8].                        |
| C     | $d_8$ | $-\log\left(\frac{2 \cdot I_{XY}}{\lambda(X, Y)}\right)$         | Variant of $d_6$ rescaled for phylogenetic inference [14].                                |
| C     | $d_9$ | $-\log\left(\frac{2 \cdot I_{XY}}{\lambda_{\min}(X, Y)}\right)$  | Variant of $d_7$ rescaled for phylogenetic inference [8].                                 |

Distance formulae can be subdivided into three groups A, B and C based on the type of denominator. Each formula addresses specific intergenomic relationships. All definitions used within the formulae are explained in Materials and Methods. Formulae of type C preserve the most information, among these,  $d_9$  performed best in a phylogenetic context. But only formulae of type B are robust against the use of incompletely sequenced genomes [8]. When using the web service on <http://ggdc.gbdp.org> only formulae  $d_0$ ,  $d_4$  and  $d_6$  (named formulae 1, 2 and 3 in the result e-mail) are reported since these are most relevant in the context of digital DDH [16].
